# Supplementary material for: A soluble cryogenic thermometer with high sensitivity based on excited-state configuration transformations
Source: Royal Society of Chemistry journal article supplement (doi:10.1039/c5cp04400f), 2015-01-01
Supplement: c5cp04400f1.pdf [file c5cp04400f1.pdf]

## Electronic supplementary information

### **A Soluble Cryogenic Thermometer with High Sensitivity Based on Excited-state Configuration Transformations**

*Jianwei Chen<sup>a,b</sup>, Yishi Wu<sup>a\*</sup>, Xuedong Wang<sup>a,b</sup>, Zhenyi Yu<sup>a,b</sup>, He Tian<sup>d\*</sup>, Jiannian Yao<sup>a\*</sup>, Hongbing Fu<sup>b,d\*</sup>*

<sup>a</sup> Beijing National Laboratory for Molecular Sciences (BNLMS), Institute of Chemistry, Chinese Academy of Sciences, Beijing, 100190, China

<sup>b</sup> University of Chinese Academy of Sciences, Beijing, 100039, China

<sup>c</sup> Department of Chemistry, Capital Normal University, Beijing, 100048, China

<sup>d</sup> Key Laboratory for Advanced Materials and Institute of Fine Chemicals, East China University of Science & Technology, Shanghai 200237, China

## Supporting figures

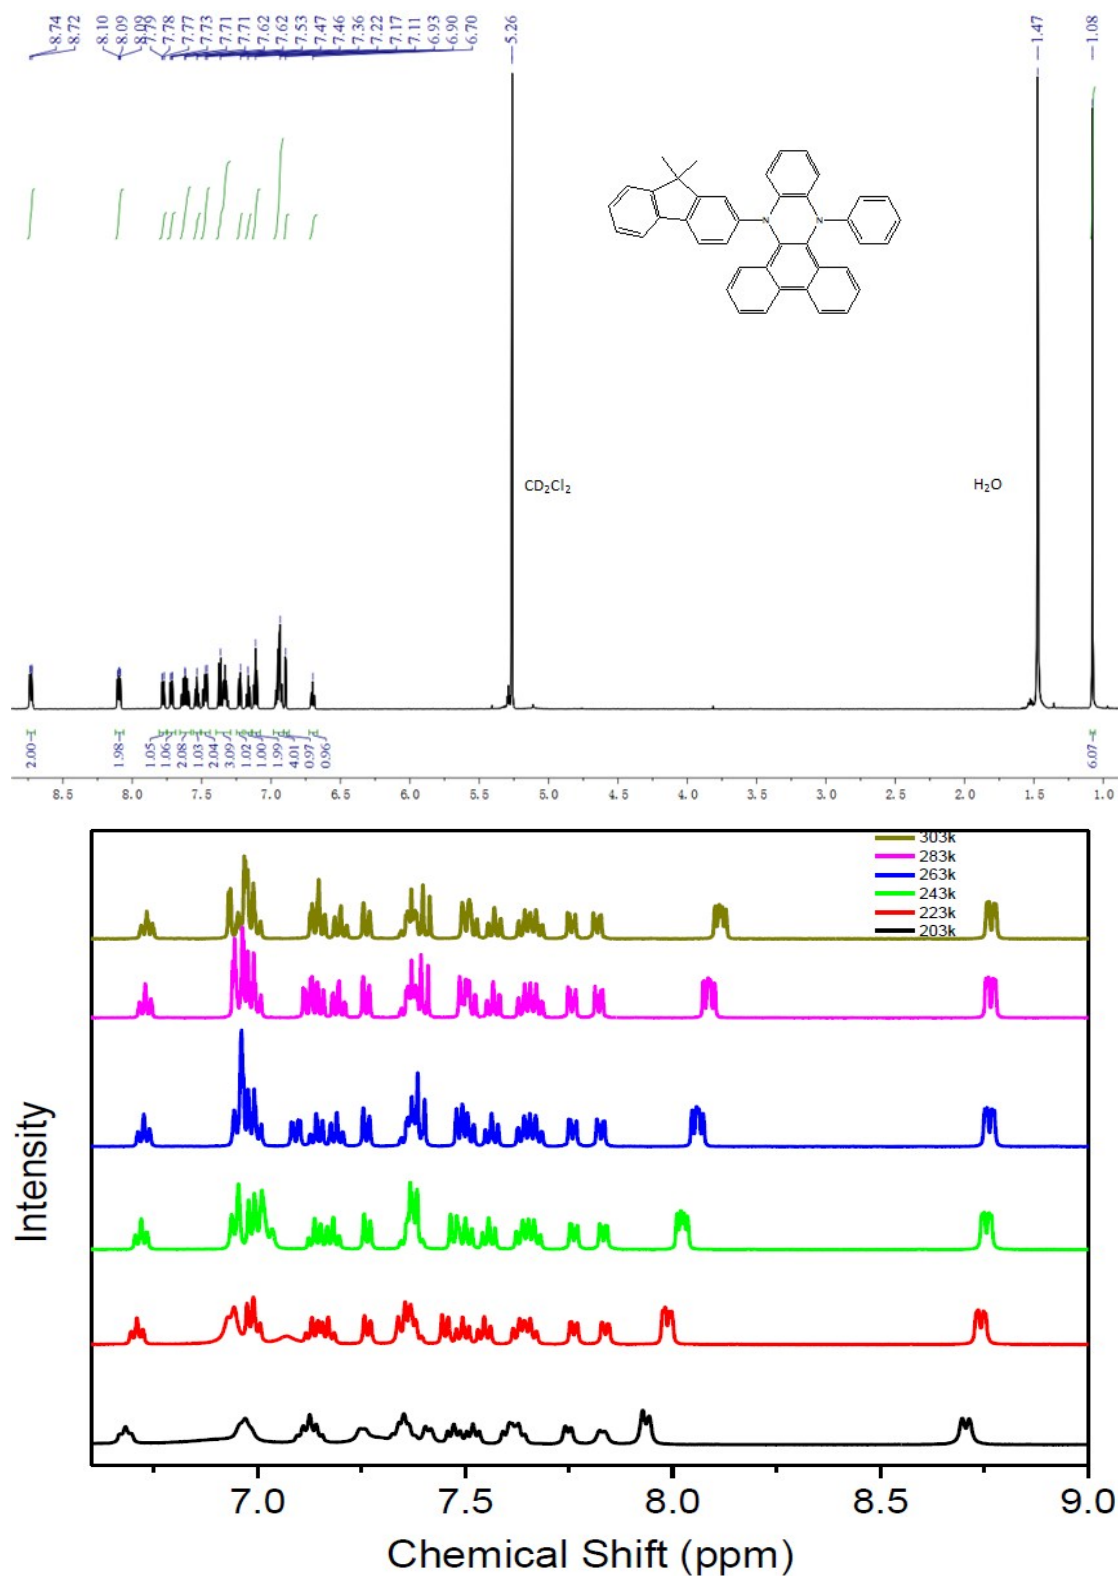

**Fig. S1** The  $^1\text{H}$  NMR spectra of FIPAC at room temperature (top) and the temperature-dependent  $^1\text{H}$  NMR spectra for the aromatic part of FIPAC ranging from 203 K to 303 K for every 20 K (bottom) in  $\text{CD}_2\text{Cl}_2$ .

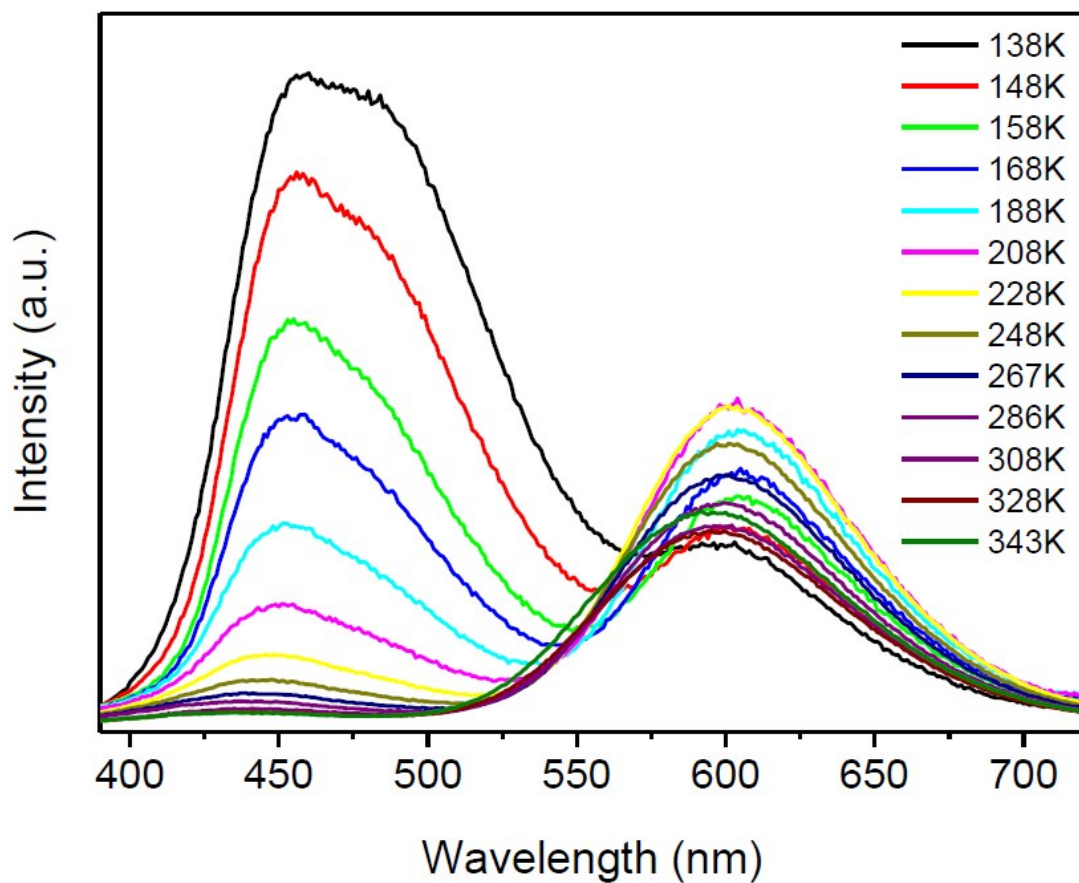

**Fig. S2** The temperature-dependent emission spectra of FIPAC from 138 K to 343 K for every 10 K.

**Table S1.** Quantum yields of FIPAC ranges from 138 K to 343 K

| T/K       | 138  | 148  | 158  | 168  | 188 | 208 | 228 | 248 | 268 | 288 | 298 | 308 | 328 | 343 |
|-----------|------|------|------|------|-----|-----|-----|-----|-----|-----|-----|-----|-----|-----|
| $\Phi/\%$ | 17.7 | 14.6 | 11.8 | 10.5 | 9.4 | 8.6 | 7.8 | 6.7 | 5.9 | 5.2 | 5.0 | 3.9 | 3.8 | 4.3 |

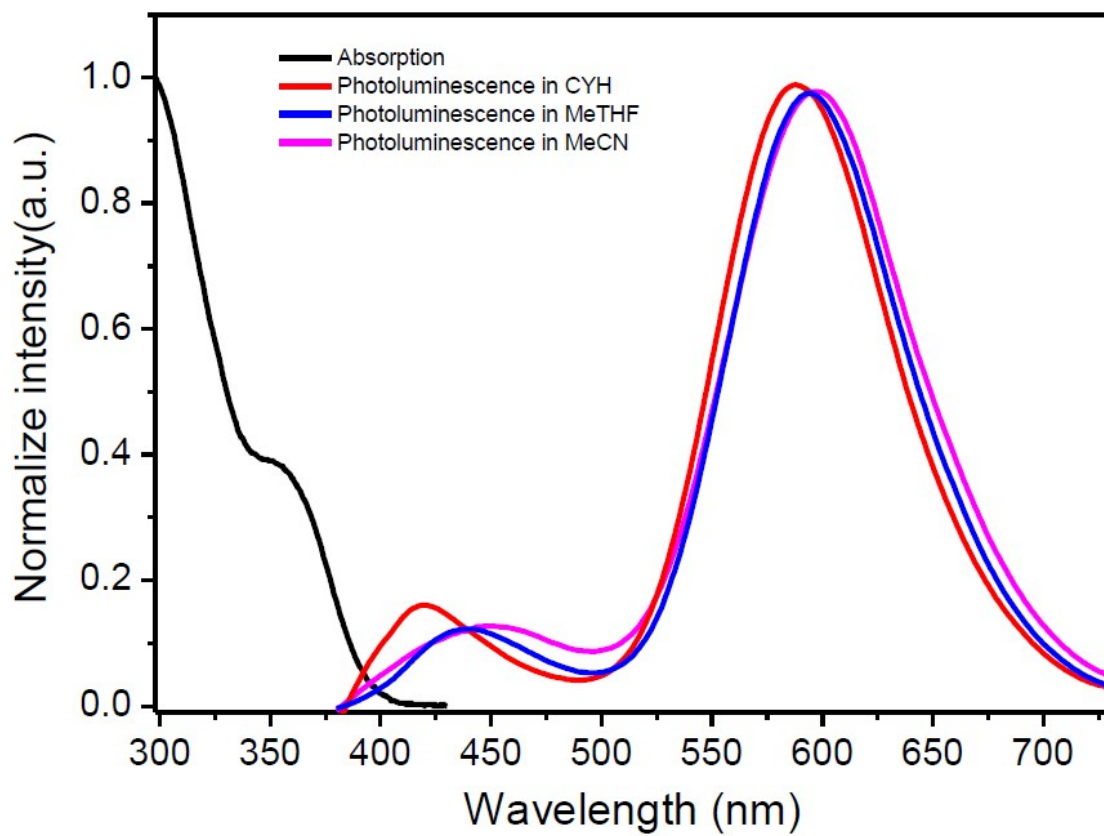

**Fig. S3** Absorption (black line) and emission spectra of FIPAC in CYH (red line), MeTHF (blue line) and MeCN (magenta line).

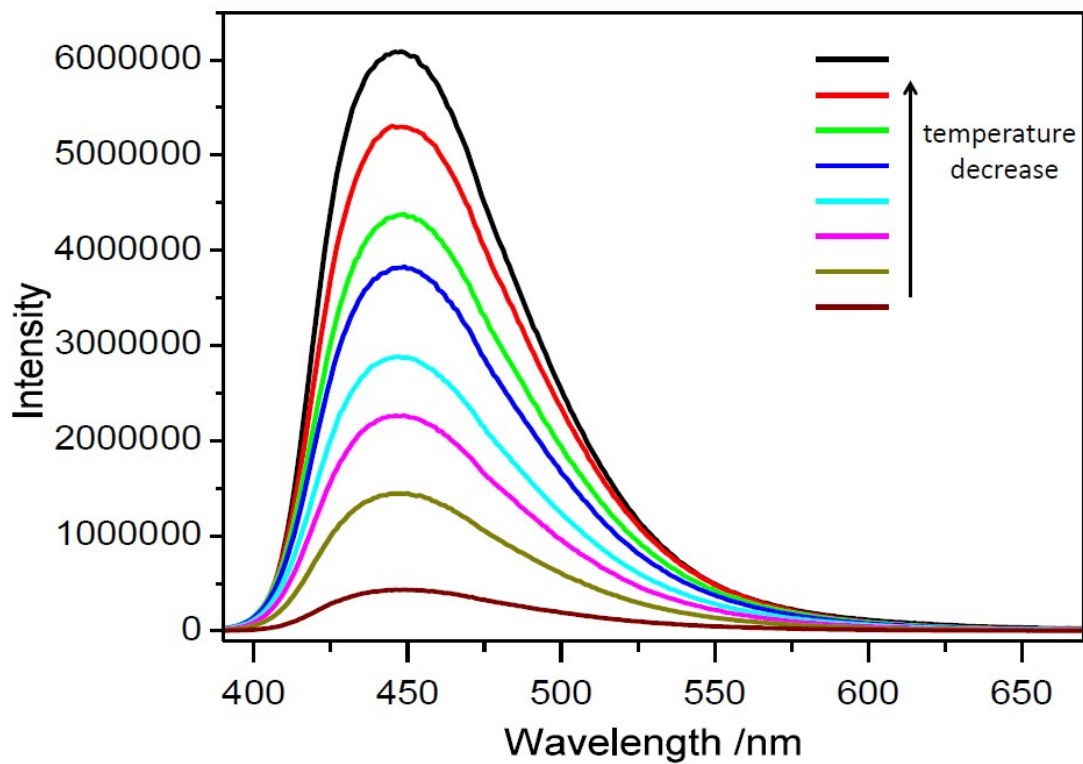

**Fig. S4** The temperature-dependent PL spectra of FIPAC film at different temperature (the wine solid line was performed at room temperature).

## Calculated for the energy barrier of excited-state configuration transforms

From the body text, it is easy to know that  $\frac{A_s}{A_l} \propto e^{\frac{\Delta E}{kT} - 1}$

From Figure 5a, the relationship between  $A_s/A_l$  and  $1/T$  can be fitted as  $A_s/A_l = -0.0947 + 0.0044 \exp(1/0.00104 T)$

Then, it should be noted that  $\frac{\Delta E}{kT} = \frac{1}{0.00104T}$

As a consequence,  $\Delta E = 7.988 \text{ kJ/mol} = 0.08279 \text{ eV}$ .

**Geometries (in a.u.) of the different states investigated in this work.**

**Ground state/F\* state**

|   |              |             |             |
|---|--------------|-------------|-------------|
| C | -7.42696000  | -4.47777900 | 0.87287900  |
| C | -6.07267800  | -4.63171400 | 0.52155800  |
| C | -5.29626900  | -3.52026600 | 0.24070300  |
| C | -5.83166000  | -2.21020600 | 0.28442200  |
| C | -7.21520800  | -2.06732100 | 0.60473200  |
| C | -7.98579600  | -3.21380900 | 0.91311000  |
| C | -5.01605500  | -1.01933600 | 0.06761400  |
| C | -3.62689900  | -1.08515100 | -0.19911400 |
| C | -2.85722100  | 0.05844400  | -0.32830700 |
| H | -1.79285900  | -0.02803600 | -0.53089800 |
| C | -3.44760500  | 1.32797300  | -0.18385400 |
| C | -4.80397100  | 1.42961600  | 0.06475600  |
| C | -5.61215400  | 0.27299600  | 0.17674600  |
| C | -7.03481400  | 0.37061100  | 0.40347400  |
| C | -7.80038700  | -0.74797400 | 0.60689500  |
| H | -8.03231300  | -5.34821900 | 1.11165900  |
| H | -5.62945400  | -5.62329000 | 0.48027500  |
| H | -9.02862000  | -3.08530500 | 1.18151800  |
| H | -2.84084400  | 2.22582900  | -0.26670200 |
| H | -5.26717200  | 2.40375200  | 0.17626100  |
| N | -7.67013300  | 1.64305700  | 0.57289900  |
| N | -9.17360700  | -0.54899000 | 0.96591900  |
| C | -8.52921200  | 1.65248100  | 1.71978400  |
| C | -8.52997100  | 2.67871500  | 2.66872600  |
| C | -9.31504900  | 0.50619500  | 1.92514700  |
| C | -9.35469100  | 2.58335700  | 3.79269000  |
| H | -7.87750700  | 3.53588700  | 2.53241900  |
| C | -10.10123600 | 0.39290400  | 3.07490400  |
| C | -10.13905800 | 1.44367800  | 3.99514700  |
| H | -9.36193800  | 3.38713400  | 4.52388300  |
| H | -10.66753100 | -0.51737300 | 3.24840400  |
| H | -10.75936800 | 1.35900000  | 4.88327600  |
| C | -10.21863500 | -0.84723100 | 0.04515000  |
| C | -9.94067300  | -1.50706300 | -1.16677200 |
| C | -11.55479300 | -0.50055800 | 0.32134900  |
| C | -10.96890400 | -1.82924500 | -2.05343300 |
| H | -8.92031200  | -1.76409900 | -1.42567800 |

|   |              |             |             |
|---|--------------|-------------|-------------|
| C | -12.57228100 | -0.82180600 | -0.57787500 |
| H | -11.80545100 | 0.03347200  | 1.22981400  |
| C | -12.29461700 | -1.49526400 | -1.76955100 |
| H | -10.72045000 | -2.33992200 | -2.98074700 |
| H | -13.59345400 | -0.53563600 | -0.33755100 |
| H | -13.09131900 | -1.74591100 | -2.46424400 |
| C | -7.92221000  | 2.48764200  | -0.54655700 |
| C | -7.45519000  | 2.12738400  | -1.82800300 |
| C | -8.63045700  | 3.69828700  | -0.39878400 |
| C | -7.67291700  | 2.97521600  | -2.90600900 |
| H | -6.93655400  | 1.18576000  | -1.97058700 |
| C | -8.85484900  | 4.53921500  | -1.48910400 |
| H | -9.02560900  | 3.98234500  | 0.56847600  |
| C | -8.36833200  | 4.18837300  | -2.74958400 |
| H | -9.41092400  | 5.46188700  | -1.33962600 |
| C | -8.44192300  | 4.86092700  | -4.05112300 |
| C | -9.01564100  | 6.07979700  | -4.42519200 |
| C | -7.79176200  | 4.05179700  | -5.00719200 |
| C | -8.93477100  | 6.48467200  | -5.76174800 |
| H | -9.51783700  | 6.70797200  | -3.69296100 |
| C | -7.71472900  | 4.46008600  | -6.33500100 |
| C | -8.28962400  | 5.68282200  | -6.71126600 |
| H | -9.37649600  | 7.43052000  | -6.06584300 |
| H | -7.21591800  | 3.84465700  | -7.08104000 |
| H | -8.23390500  | 6.00981200  | -7.74657500 |
| C | -7.24855100  | 2.77511800  | -4.36248400 |
| H | -3.13978500  | -2.04913900 | -0.29612100 |
| H | -4.25139400  | -3.66983000 | -0.00800300 |
| C | -7.90364600  | 1.51397100  | -4.97137200 |
| H | -7.55430000  | 0.61020300  | -4.45787600 |
| H | -8.99451800  | 1.55584400  | -4.88533500 |
| H | -7.64579900  | 1.41999400  | -6.03322400 |
| C | -5.71116300  | 2.68445600  | -4.49514100 |
| H | -5.22636000  | 3.57229300  | -4.07511600 |
| H | -5.32784300  | 1.80308400  | -3.96755200 |
| H | -5.41886800  | 2.60155900  | -5.54898000 |

**S\* state**

|   |             |             |            |
|---|-------------|-------------|------------|
| C | -7.50302800 | -4.54376300 | 0.84270900 |
| C | -6.15170000 | -4.71187700 | 0.49545200 |
| C | -5.37244900 | -3.58485500 | 0.22272800 |
| C | -5.89109400 | -2.28007300 | 0.25916200 |
| C | -7.30039200 | -2.11904100 | 0.54293700 |
| C | -8.06691900 | -3.28046100 | 0.86767300 |



|   |              |             |             |
|---|--------------|-------------|-------------|
| C | -5.03315100  | -1.08860000 | 0.09045800  |
| C | -3.64417700  | -1.16909500 | -0.07661100 |
| C | -2.82753000  | -0.03119600 | -0.18653600 |
| H | -1.75445300  | -0.14304600 | -0.31368600 |
| C | -3.40991900  | 1.23752900  | -0.10731600 |
| C | -4.78446800  | 1.37211300  | 0.05523200  |
| C | -5.63368200  | 0.22571500  | 0.14324600  |
| C | -7.03871000  | 0.29898400  | 0.24181100  |
| C | -7.86577200  | -0.82401000 | 0.49246900  |
| H | -8.11441700  | -5.40894300 | 1.09081000  |
| H | -5.70866900  | -5.70313900 | 0.45603900  |
| H | -9.11156600  | -3.16049000 | 1.13511200  |
| H | -2.78821900  | 2.12898400  | -0.16472200 |
| H | -5.21746700  | 2.36467400  | 0.13608900  |
| N | -7.73935800  | 1.57606300  | 0.37551900  |
| N | -9.21439400  | -0.54870700 | 0.92716500  |
| C | -8.45183400  | 1.63710500  | 1.61620500  |
| C | -8.33569000  | 2.67751700  | 2.53753300  |
| C | -9.25089500  | 0.50051200  | 1.88037400  |
| C | -9.06410900  | 2.61653900  | 3.72803400  |
| H | -7.67447900  | 3.51367700  | 2.32759300  |
| C | -9.96789100  | 0.45461300  | 3.07974900  |
| C | -9.88128300  | 1.51189900  | 3.99015900  |
| H | -8.97870300  | 3.41919800  | 4.45496100  |
| H | -10.56581800 | -0.42264400 | 3.30618200  |
| H | -10.43320300 | 1.45745900  | 4.92470400  |
| C | -10.34214100 | -0.84834100 | 0.12013100  |
| C | -10.18647700 | -1.62746600 | -1.04420100 |
| C | -11.63598400 | -0.39310900 | 0.44614200  |
| C | -11.28767500 | -1.94189200 | -1.83994800 |
| H | -9.20158100  | -1.98480200 | -1.31937900 |
| C | -12.72814200 | -0.71473100 | -0.36128100 |
| H | -11.79666700 | 0.22366600  | 1.32277000  |
| C | -12.56991200 | -1.49431800 | -1.50991200 |
| H | -11.13418000 | -2.54907900 | -2.72916800 |
| H | -13.71272400 | -0.34519800 | -0.08334700 |
| H | -13.42459700 | -1.74774700 | -2.13111200 |
| C | -7.99415600  | 2.39297000  | -0.67144100 |
| C | -7.32967200  | 2.16767800  | -1.92568400 |
| C | -8.92236500  | 3.48942200  | -0.55995400 |
| C | -7.59161800  | 2.99869700  | -2.98255600 |
| H | -6.63477000  | 1.34229100  | -2.00092800 |
| C | -9.16914100  | 4.31669700  | -1.63003900 |
| H | -9.45122400  | 3.63809400  | 0.37263200  |

|   |             |             |             |
|---|-------------|-------------|-------------|
| C | -8.50485400 | 4.08767700  | -2.85733300 |
| H | -9.88474800 | 5.12805800  | -1.53050200 |
| C | -8.57662000 | 4.78505000  | -4.11673700 |
| C | -9.32541700 | 5.91394800  | -4.49720900 |
| C | -7.71277500 | 4.13905700  | -5.04045100 |
| C | -9.20363700 | 6.38722700  | -5.79991100 |
| H | -9.98657700 | 6.40807400  | -3.79043500 |
| C | -7.60059700 | 4.62164100  | -6.33785500 |
| C | -8.34842200 | 5.74687200  | -6.71370700 |
| H | -9.77212600 | 7.25722200  | -6.11605200 |
| H | -6.94509200 | 4.14125800  | -7.05962600 |
| H | -8.26614700 | 6.13066000  | -7.72692800 |
| C | -7.01041400 | 2.94703700  | -4.39485900 |
| H | -3.16485900 | -2.14210800 | -0.10575300 |
| H | -4.32274600 | -3.73599400 | -0.00820100 |
| C | -7.37419100 | 1.62144500  | -5.10424300 |
| H | -6.91134000 | 0.77252500  | -4.59022200 |
| H | -8.45744300 | 1.46235400  | -5.12202500 |
| H | -7.01015300 | 1.62983100  | -6.13793000 |
| C | -5.47515200 | 3.13540800  | -4.37874100 |
| H | -5.19436400 | 4.07335100  | -3.88799400 |
| H | -4.99243800 | 2.31162200  | -3.84302700 |
| H | -5.08242200 | 3.15264000  | -5.40175600 |

**P\* state**

|   |             |             |             |
|---|-------------|-------------|-------------|
| C | -3.81883600 | -3.23663100 | -1.90446600 |
| C | -3.15595300 | -4.32497900 | -1.31992500 |
| C | -2.21715300 | -4.08924600 | -0.31715400 |
| C | -1.92611200 | -2.79389300 | 0.14708900  |
| C | -2.58854400 | -1.67554700 | -0.46665900 |
| C | -3.53503900 | -1.94190200 | -1.49642600 |
| C | -0.98164600 | -2.56044500 | 1.25045400  |
| C | -0.56765200 | -3.60134500 | 2.10140300  |
| C | 0.37669000  | -3.40652900 | 3.10712800  |
| H | 0.67224800  | -4.23377800 | 3.74673600  |
| C | 0.92210000  | -2.12825400 | 3.29301100  |
| C | 0.51529500  | -1.06945400 | 2.49516500  |
| C | -0.44597900 | -1.24283400 | 1.45933300  |
| C | -0.96269800 | -0.17847000 | 0.65179800  |
| C | -2.20794200 | -0.36242900 | -0.04134800 |
| H | -4.53985000 | -3.39884100 | -2.70245500 |
| H | -3.35553200 | -5.33973700 | -1.65340400 |
| H | -4.02257600 | -1.11795100 | -2.00124300 |
| H | 1.64836500  | -1.95221400 | 4.08326400  |

|   |             |             |             |
|---|-------------|-------------|-------------|
| H | 0.91630400  | -0.08408600 | 2.69461100  |
| N | -0.29705200 | 1.05328200  | 0.45487000  |
| N | -3.00753000 | 0.78775700  | -0.23418900 |
| C | -1.00426800 | 2.15246700  | 0.00720100  |
| C | -0.39224200 | 3.40414700  | -0.25874300 |
| C | -2.43687800 | 2.04311900  | -0.15985400 |
| C | -1.15267900 | 4.53535900  | -0.48278700 |
| H | 0.68764300  | 3.47732400  | -0.25317100 |
| C | -3.19010800 | 3.23863800  | -0.28810700 |
| C | -2.56488900 | 4.46058300  | -0.44184600 |
| H | -0.65893300 | 5.48507300  | -0.66669500 |
| H | -4.27129500 | 3.18594200  | -0.29795500 |
| H | -3.16492300 | 5.35875900  | -0.55529600 |
| C | -4.44726700 | 0.66548900  | -0.21857600 |
| C | -5.06776000 | 0.11366700  | 0.90567100  |
| C | -5.21057900 | 1.07749900  | -1.31666300 |
| C | -6.45705500 | -0.01891300 | 0.93267000  |
| H | -4.45984400 | -0.21497500 | 1.74339300  |
| C | -6.60052700 | 0.94371800  | -1.28207600 |
| H | -4.71558100 | 1.48807300  | -2.19217500 |
| C | -7.22718400 | 0.39625600  | -0.15911000 |
| H | -6.93706600 | -0.44686800 | 1.80864000  |
| H | -7.19084900 | 1.25906200  | -2.13848600 |
| H | -8.30820600 | 0.28789000  | -0.13670200 |
| C | 1.14670100  | 1.08826500  | 0.44587200  |
| C | 1.83487100  | 0.25366600  | -0.44572700 |
| C | 1.84485600  | 1.91945500  | 1.33341300  |
| C | 3.22311200  | 0.27183000  | -0.44842300 |
| H | 1.26943800  | -0.39411800 | -1.11020400 |
| C | 3.24107900  | 1.93812600  | 1.32898900  |
| H | 1.29040200  | 2.53906600  | 2.03241400  |
| C | 3.93163600  | 1.11429400  | 0.43558500  |
| H | 3.77333700  | 2.58309600  | 2.02377500  |
| C | 5.36843100  | 0.92500200  | 0.20832900  |
| C | 6.47807800  | 1.51770600  | 0.81918500  |
| C | 5.53514300  | -0.03126900 | -0.81523100 |
| C | 7.75833100  | 1.14691700  | 0.39811200  |
| H | 6.35385700  | 2.25450300  | 1.60935200  |
| C | 6.81283500  | -0.39570000 | -1.22996800 |
| C | 7.92591200  | 0.19781300  | -0.61882300 |
| H | 8.63099600  | 1.59819900  | 0.86338600  |
| H | 6.95615500  | -1.13212400 | -2.01775000 |
| H | 8.92753900  | -0.08104700 | -0.93609500 |
| C | 4.18351200  | -0.53540500 | -1.32175500 |

|   |             |             |             |
|---|-------------|-------------|-------------|
| H | -1.00194500 | -4.58895200 | 1.98229700  |
| H | -1.68960600 | -4.93702100 | 0.10842100  |
| C | 3.98631300  | -0.21849500 | -2.82230900 |
| H | 2.98878700  | -0.52820500 | -3.15576600 |
| H | 4.09681300  | 0.85340500  | -3.01859200 |
| H | 4.72509600  | -0.75556000 | -3.42885700 |
| C | 4.02008800  | -2.05436200 | -1.07911300 |
| H | 4.15980500  | -2.30343700 | -0.02218200 |
| H | 3.02062100  | -2.39007000 | -1.37894800 |
| H | 4.75595400  | -2.61772600 | -1.66528100 |
